# Supplementary material for: Quantitative kinetics of the atmospheric reaction between isocyanic acid and hydroxyl radicals: post-CCSD(T) contribution, anharmonicity, recrossing effects, torsional anharmonicity, and tunneling
Source: Royal Society of Chemistry journal article supplement (doi:10.1039/d3cp04385a), 2023-11-23
Supplement: d3cp04385a1.pdf [file d3cp04385a1.pdf]

---

ELECTRONIC SUPPORTING INFORMATION

**Quantitative kinetics of the atmospheric reaction between isocyanic acid and hydroxyl radical: post-CCSD(T) contribution, anharmonicity, recrossing effects, torsional anharmonicity, and tunneling**

Dai-Dan Deng,<sup>a</sup> Bo Long<sup>\*a, b</sup>

<sup>a</sup> College of Physics and Mechatronic Engineering, Guizhou Minzu University, Guiyang 550025, China

<sup>b</sup> College of Materials Science and Engineering, Guizhou Minzu university, Guiyang 550025, China

CONTENTS

|                                                                                                                                                     |      |
|-----------------------------------------------------------------------------------------------------------------------------------------------------|------|
| Note on spin-orbit coupling                                                                                                                         | S-2  |
| Electronic partition functions                                                                                                                      | S-2  |
| Table S1. Scale factors applied to vibrational frequencies.                                                                                         | S-3  |
| Table S2. Energies (classical barrier heights) of the HNCO + OH reaction and mean unsigned deviations at the different theoretical methods.         | S-3  |
| Table S3. The relative zero-point vibrational energies of the HNCO + OH reaction and mean unsigned deviations at the different theoretical methods. | S-3  |
| Table S4. The enthalpies of activation at 0 K for OH reaction with HNCO.                                                                            | S-4  |
| Table S5. The rate constant of the TS1.                                                                                                             | S-4  |
| Table S6. The rate constant of the TS2.                                                                                                             | S-6  |
| Table S7. The total rate constant of the HNCO + OH reaction.                                                                                        | S-8  |
| Table S8. The conventional transition state theory (TST) rate constants without a transmission coefficient for HNCO + OH reaction.                  | S-10 |
| Table S9. The Cartesian coordinates (Å) of the optimized geometries.                                                                                | S-12 |
| Table S10. Absolute energies in Hartree.                                                                                                            | S-15 |
| Figure S1. The enthalpy profile of the OH reaction with HNCO as calculated by M08-HX/MG3S with the scale factor by standard method at 0 K.          | S-17 |

---

\*Corresponding author, E-mail: [wwwlcommon@sina.com](mailto:wwwlcommon@sina.com) (Bo Long)

Figure S2. Intrinsic Reaction Coordinate (IRC) calculations for TS1. S-19

Figure S3. Intrinsic Reaction Coordinate (IRC) calculations for TS2. S-19

**Note on spin-orbit coupling**

All calculations in the full text and SI include the spin-orbit coupling, which raises the barrier height, enthalpy of activation, and reaction energy by 0.20 kcal/mol.

**Electronic partition functions**

The rate constants include the ratio of electronic partition functions  $\frac{g_{TS1}}{g_{HNC} g_{OH}}$ . To calculate the electron partition functions, we used 0.4 kcal/mol as the energy difference between the two spin-orbit splitting states of OH( $^2\Pi$ ). For other species, we treat the electronic partition function as the electronic degeneracy of the ground state. The results of these treatments are as follows:

$$g_{TS1} = 2$$

$$g_{HNC} = 1$$

$$g_{OH} \approx 2 + 2 \exp[-(0.4 \text{ kcal/mol})/RT]$$

Table S1. Scale factors applied to vibrational frequencies.

| Methods                            | Scale Factor |
|------------------------------------|--------------|
| CCSD(T)-F12a/cc-pVTZ-F12           | 0.984        |
| CCSD(T)-F12a/cc-pVDZ-F12           | 0.983        |
| CCSD(T)-F12b/ <i>jun'</i> -cc-pVDZ | 0.981        |
| M08-HX/MG3S                        | 0.973        |
| M05-2X/aug-cc-pVTZ                 | 0.964        |

Table S2. Energies (classical barrier heights) of the HNCO + OH reaction and mean unsigned deviations at the different theoretical methods.<sup>a</sup> (kcal/mol)

| Methods                                 | $\Delta V^\ddagger$ |      |      |
|-----------------------------------------|---------------------|------|------|
|                                         | TS1                 | TS2  | MUD  |
| W2X//CCSD(T)-F12a/cc-pVTZ-F12           | 6.81                | 6.85 | 0.00 |
| W2X//CCSD(T)-F12a/cc-pVDZ-F12           | 6.80                | 6.86 | 0.00 |
| W2X//CCSD(T)-F12b/ <i>jun'</i> -cc-pVDZ | 6.80                | 6.86 | 0.01 |

<sup>a</sup>All reactant energies used to compute barrier heights and enthalpies in this table include a spin-orbit contribution of -0.20 kcal/mol, and this raised all reported barrier heights and enthalpies of activation by 0.20 kcal/mol.

Table S3. The relative zero-point vibrational energies of the HNCO + OH reaction and mean unsigned deviations at the different theoretical methods. (kcal/mol)

| Methods                            | $(\Delta E_{ZPE}^\ddagger)$ |      |      |
|------------------------------------|-----------------------------|------|------|
|                                    | TS1                         | TS2  | MUD  |
| CCSD(T)-F12a/cc-pVTZ-F12           | -0.88                       | 2.26 | 0.00 |
| CCSD(T)-F12a/cc-pVDZ-F12           | -0.65                       | 2.26 | 0.12 |
| CCSD(T)-F12b/ <i>jun'</i> -cc-pVDZ | -0.63                       | 2.27 | 0.13 |

Table S4. The enthalpy of activation at 0 K for OH reaction with HNCO (kcal/mol).

| Method                                          | $\Delta H_0^\ddagger$ |       |
|-------------------------------------------------|-----------------------|-------|
|                                                 | TS1                   | TS2   |
| GMM(P).L//CCSD(T)-F12a/cc-pVTZ-F12 <sup>a</sup> | 5.05                  | 8.22  |
| GMM(P).L//CCSD(T)-F12a/cc-pVTZ-F12 <sup>b</sup> | 4.67                  | 8.12  |
| Effect of scale factor                          | -0.38                 | -0.11 |

<sup>a</sup> The enthalpy of activation at 0 K calculated with harmonic zero-point vibration energy without a scale factor.

<sup>b</sup> The enthalpy of activation at 0 K calculated with anharmonic zero-point vibration energies using the reaction-specific scale factors calculated by using the MPW1K/MG3S method.

Table S5. The rate constant ( $\text{cm}^3 \text{ molecule}^{-1} \text{ s}^{-1}$ ) of the TS1.

| T(K) | $\kappa_{HL}^{TST^a}$ | $\Gamma_{LL}^b$ | $k_{LL}^{SCT^c}$ | $F_{act}^{MS-T^d}$ | $k_1^e$  |
|------|-----------------------|-----------------|------------------|--------------------|----------|
| 190  | 3.06E-18              | 0.826           | 1.62E+03         | 0.44               | 1.80E-15 |
| 200  | 5.72E-18              | 0.830           | 8.39E+02         | 0.44               | 1.76E-15 |
| 210  | 1.01E-17              | 0.834           | 4.73E+02         | 0.44               | 1.75E-15 |
| 220  | 1.70E-17              | 0.837           | 2.86E+02         | 0.44               | 1.79E-15 |
| 230  | 2.73E-17              | 0.839           | 1.84E+02         | 0.44               | 1.86E-15 |
| 240  | 4.24E-17              | 0.842           | 1.24E+02         | 0.44               | 1.96E-15 |
| 250  | 6.35E-17              | 0.844           | 8.78E+01         | 0.44               | 2.08E-15 |
| 260  | 9.25E-17              | 0.845           | 6.43E+01         | 0.44               | 2.22E-15 |
| 270  | 1.31E-16              | 0.847           | 4.86E+01         | 0.44               | 2.39E-15 |
| 280  | 1.82E-16              | 0.848           | 3.79E+01         | 0.44               | 2.59E-15 |
| 290  | 2.47E-16              | 0.850           | 3.02E+01         | 0.44               | 2.81E-15 |
| 298  | 3.11E-16              | 0.850           | 2.56E+01         | 0.44               | 3.00E-15 |
| 300  | 3.29E-16              | 0.851           | 2.46E+01         | 0.44               | 3.05E-15 |
| 310  | 4.30E-16              | 0.851           | 2.04E+01         | 0.45               | 3.33E-15 |
| 320  | 5.55E-16              | 0.852           | 1.72E+01         | 0.45               | 3.62E-15 |
| 330  | 7.06E-16              | 0.853           | 1.47E+01         | 0.45               | 3.95E-15 |
| 340  | 8.86E-16              | 0.853           | 1.27E+01         | 0.45               | 4.30E-15 |

|      |          |       |          |      |          |
|------|----------|-------|----------|------|----------|
| 350  | 1.10E-15 | 0.854 | 1.12E+01 | 0.45 | 4.69E-15 |
| 390  | 2.37E-15 | 0.855 | 7.24E+00 | 0.45 | 6.56E-15 |
| 440  | 5.19E-15 | 0.854 | 4.88E+00 | 0.45 | 9.75E-15 |
| 490  | 9.93E-15 | 0.853 | 3.67E+00 | 0.45 | 1.40E-14 |
| 540  | 1.72E-14 | 0.851 | 2.96E+00 | 0.45 | 1.96E-14 |
| 590  | 2.77E-14 | 0.848 | 2.51E+00 | 0.46 | 2.68E-14 |
| 640  | 4.20E-14 | 0.845 | 2.20E+00 | 0.46 | 3.57E-14 |
| 690  | 6.08E-14 | 0.842 | 1.98E+00 | 0.46 | 4.66E-14 |
| 740  | 8.49E-14 | 0.838 | 1.82E+00 | 0.46 | 5.98E-14 |
| 790  | 1.15E-13 | 0.835 | 1.70E+00 | 0.46 | 7.55E-14 |
| 840  | 1.52E-13 | 0.831 | 1.60E+00 | 0.47 | 9.41E-14 |
| 890  | 1.96E-13 | 0.828 | 1.52E+00 | 0.47 | 1.16E-13 |
| 940  | 2.49E-13 | 0.824 | 1.46E+00 | 0.47 | 1.41E-13 |
| 990  | 3.10E-13 | 0.821 | 1.41E+00 | 0.47 | 1.69E-13 |
| 1040 | 3.82E-13 | 0.818 | 1.37E+00 | 0.47 | 2.02E-13 |
| 1090 | 4.64E-13 | 0.814 | 1.33E+00 | 0.48 | 2.39E-13 |
| 1140 | 5.57E-13 | 0.811 | 1.30E+00 | 0.48 | 2.80E-13 |
| 1190 | 6.63E-13 | 0.808 | 1.27E+00 | 0.48 | 3.26E-13 |
| 1240 | 7.82E-13 | 0.804 | 1.25E+00 | 0.48 | 3.78E-13 |
| 1290 | 9.14E-13 | 0.801 | 1.23E+00 | 0.48 | 4.34E-13 |
| 1340 | 1.06E-12 | 0.798 | 1.21E+00 | 0.49 | 4.97E-13 |
| 1390 | 1.22E-12 | 0.795 | 1.19E+00 | 0.49 | 5.65E-13 |
| 1440 | 1.40E-12 | 0.792 | 1.18E+00 | 0.49 | 6.39E-13 |
| 1490 | 1.60E-12 | 0.789 | 1.17E+00 | 0.49 | 7.19E-13 |
| 1540 | 1.81E-12 | 0.787 | 1.16E+00 | 0.49 | 8.07E-13 |
| 1590 | 2.04E-12 | 0.784 | 1.15E+00 | 0.49 | 9.00E-13 |
| 1640 | 2.29E-12 | 0.781 | 1.14E+00 | 0.49 | 1.00E-12 |
| 1690 | 2.56E-12 | 0.779 | 1.13E+00 | 0.49 | 1.11E-12 |
| 1740 | 2.85E-12 | 0.776 | 1.12E+00 | 0.49 | 1.23E-12 |
| 1790 | 3.16E-12 | 0.774 | 1.11E+00 | 0.49 | 1.35E-12 |
| 1840 | 3.50E-12 | 0.771 | 1.11E+00 | 0.50 | 1.48E-12 |
| 1890 | 3.85E-12 | 0.769 | 1.10E+00 | 0.50 | 1.62E-12 |
| 1940 | 4.23E-12 | 0.767 | 1.10E+00 | 0.50 | 1.77E-12 |
| 1990 | 4.64E-12 | 0.764 | 1.09E+00 | 0.50 | 1.92E-12 |
| 2040 | 5.07E-12 | 0.762 | 1.09E+00 | 0.50 | 2.09E-12 |
| 2090 | 5.52E-12 | 0.760 | 1.08E+00 | 0.50 | 2.26E-12 |
| 2140 | 6.00E-12 | 0.758 | 1.08E+00 | 0.50 | 2.44E-12 |
| 2190 | 6.51E-12 | 0.756 | 1.07E+00 | 0.50 | 2.64E-12 |
| 2240 | 7.04E-12 | 0.754 | 1.07E+00 | 0.50 | 2.84E-12 |
| 2290 | 7.60E-12 | 0.752 | 1.07E+00 | 0.50 | 3.05E-12 |
| 2340 | 8.19E-12 | 0.750 | 1.07E+00 | 0.50 | 3.27E-12 |
| 2390 | 8.81E-12 | 0.748 | 1.06E+00 | 0.50 | 3.50E-12 |
| 2440 | 9.46E-12 | 0.746 | 1.06E+00 | 0.50 | 3.74E-12 |

|      |          |       |          |      |          |
|------|----------|-------|----------|------|----------|
| 2490 | 1.01E-11 | 0.745 | 1.06E+00 | 0.50 | 3.99E-12 |
| 2540 | 1.08E-11 | 0.743 | 1.06E+00 | 0.50 | 4.24E-12 |
| 2590 | 1.16E-11 | 0.741 | 1.05E+00 | 0.50 | 4.51E-12 |
| 2640 | 1.24E-11 | 0.740 | 1.05E+00 | 0.50 | 4.79E-12 |
| 2690 | 1.32E-11 | 0.738 | 1.05E+00 | 0.50 | 5.08E-12 |
| 2740 | 1.40E-11 | 0.736 | 1.05E+00 | 0.50 | 5.37E-12 |
| 2790 | 1.49E-11 | 0.735 | 1.05E+00 | 0.50 | 5.68E-12 |
| 2840 | 1.58E-11 | 0.733 | 1.04E+00 | 0.50 | 6.01E-12 |
| 2890 | 1.67E-11 | 0.732 | 1.04E+00 | 0.50 | 6.34E-12 |
| 2940 | 1.77E-11 | 0.730 | 1.04E+00 | 0.50 | 6.68E-12 |
| 2990 | 1.87E-11 | 0.729 | 1.04E+00 | 0.50 | 7.03E-12 |
| 3000 | 1.89E-11 | 0.729 | 1.04E+00 | 0.50 | 7.10E-12 |

<sup>a</sup> $k_{HL}^{TST}$  is the conventional transition state theory rate constant calculated with the high level.

<sup>b</sup>The  $\Gamma_{LL}$  is the LL recrossing transmission coefficient, which equals  $k_{LL}^{CVT}/k_{LL}^{TST}$ .

<sup>c</sup>The  $k_{LL}^{SCT}$  is the LL tunneling coefficient.

<sup>d</sup> $F_{act}^{MS-T} = \frac{F_{TS}^{MS-T}}{F_{OH}^{MS-T} F_{HNCO}^{MS-T}}$ , where  $F_{OH}^{MS-T}$  is 1,  $F_{HNCO}^{MS-T}$  and  $F_{TS}^{MS-T}$  are calculated using the multi-structural method with torsional anharmonicity based on a coupled torsional potential.

<sup>e</sup>rate constant of the HNCO + OH reaction using variational transition state theory with small-curvature tunneling and torsional anharmonicity.

Here, it is worth noting that where HL denote higher level with GMM(P).L//CCSD(T)-F12a/cc-pVTZ-F12 level, and LL denote lower level with M08-HX/MG3S level.

Table S6. The rate constant ( $\text{cm}^3 \text{ molecule}^{-1} \text{ s}^{-1}$ ) of the TS2.

| T(K) | $k_{HL}^{TST}$ <sup>a</sup> | $\Gamma_{LL}^b$ | $k_{LL}^{SCT}$ <sup>c</sup> | $F_{act}^{MS-T}$ | $k_2$    |
|------|-----------------------------|-----------------|-----------------------------|------------------|----------|
| 190  | 9.72E-23                    | 0.986           | 4.33E+00                    | 0.85             | 3.54E-22 |
| 200  | 2.77E-22                    | 0.986           | 3.60E+00                    | 0.85             | 8.38E-22 |
| 210  | 7.14E-22                    | 0.986           | 3.10E+00                    | 0.85             | 1.86E-21 |
| 220  | 1.69E-21                    | 0.986           | 2.75E+00                    | 0.85             | 3.89E-21 |
| 230  | 3.72E-21                    | 0.986           | 2.48E+00                    | 0.85             | 7.71E-21 |
| 240  | 7.67E-21                    | 0.986           | 2.27E+00                    | 0.85             | 1.46E-20 |
| 250  | 1.49E-20                    | 0.986           | 2.11E+00                    | 0.85             | 2.63E-20 |
| 260  | 2.77E-20                    | 0.986           | 1.98E+00                    | 0.84             | 4.55E-20 |

|      |          |       |          |      |          |
|------|----------|-------|----------|------|----------|
| 270  | 4.91E-20 | 0.986 | 1.87E+00 | 0.84 | 7.62E-20 |
| 280  | 8.36E-20 | 0.986 | 1.78E+00 | 0.84 | 1.23E-19 |
| 290  | 1.37E-19 | 0.986 | 1.71E+00 | 0.84 | 1.94E-19 |
| 298  | 2.00E-19 | 0.985 | 1.65E+00 | 0.84 | 2.73E-19 |
| 300  | 2.19E-19 | 0.985 | 1.64E+00 | 0.84 | 2.96E-19 |
| 310  | 3.38E-19 | 0.985 | 1.59E+00 | 0.84 | 4.42E-19 |
| 320  | 5.10E-19 | 0.985 | 1.54E+00 | 0.84 | 6.45E-19 |
| 330  | 7.50E-19 | 0.985 | 1.50E+00 | 0.83 | 9.22E-19 |
| 340  | 1.08E-18 | 0.985 | 1.46E+00 | 0.83 | 1.29E-18 |
| 350  | 1.53E-18 | 0.984 | 1.43E+00 | 0.83 | 1.78E-18 |
| 390  | 5.13E-18 | 0.983 | 1.33E+00 | 0.83 | 5.55E-18 |
| 440  | 1.75E-17 | 0.982 | 1.25E+00 | 0.83 | 1.77E-17 |
| 490  | 4.74E-17 | 0.980 | 1.19E+00 | 0.82 | 4.57E-17 |
| 540  | 1.09E-16 | 0.978 | 1.15E+00 | 0.83 | 1.01E-16 |
| 590  | 2.20E-16 | 0.976 | 1.13E+00 | 0.83 | 2.01E-16 |
| 640  | 4.05E-16 | 0.974 | 1.11E+00 | 0.83 | 3.63E-16 |
| 690  | 6.89E-16 | 0.972 | 1.09E+00 | 0.84 | 6.12E-16 |
| 740  | 1.10E-15 | 0.970 | 1.08E+00 | 0.84 | 9.76E-16 |
| 790  | 1.68E-15 | 0.968 | 1.07E+00 | 0.85 | 1.48E-15 |
| 840  | 2.46E-15 | 0.966 | 1.06E+00 | 0.86 | 2.16E-15 |
| 890  | 3.48E-15 | 0.964 | 1.05E+00 | 0.87 | 3.06E-15 |
| 940  | 4.77E-15 | 0.962 | 1.05E+00 | 0.87 | 4.19E-15 |
| 990  | 6.37E-15 | 0.960 | 1.04E+00 | 0.88 | 5.62E-15 |
| 1040 | 8.32E-15 | 0.958 | 1.04E+00 | 0.89 | 7.38E-15 |
| 1090 | 1.07E-14 | 0.956 | 1.04E+00 | 0.90 | 9.50E-15 |
| 1140 | 1.35E-14 | 0.954 | 1.03E+00 | 0.91 | 1.20E-14 |
| 1190 | 1.67E-14 | 0.953 | 1.03E+00 | 0.92 | 1.50E-14 |
| 1240 | 2.05E-14 | 0.951 | 1.03E+00 | 0.93 | 1.85E-14 |
| 1290 | 2.48E-14 | 0.949 | 1.03E+00 | 0.93 | 2.25E-14 |
| 1340 | 2.97E-14 | 0.947 | 1.02E+00 | 0.94 | 2.71E-14 |
| 1390 | 3.53E-14 | 0.946 | 1.02E+00 | 0.95 | 3.24E-14 |
| 1440 | 4.15E-14 | 0.944 | 1.02E+00 | 0.96 | 3.83E-14 |
| 1490 | 4.84E-14 | 0.942 | 1.02E+00 | 0.97 | 4.50E-14 |
| 1540 | 5.61E-14 | 0.941 | 1.02E+00 | 0.98 | 5.24E-14 |
| 1590 | 6.45E-14 | 0.939 | 1.02E+00 | 0.98 | 6.06E-14 |
| 1640 | 7.38E-14 | 0.937 | 1.02E+00 | 0.99 | 6.97E-14 |
| 1690 | 8.39E-14 | 0.936 | 1.01E+00 | 1.00 | 7.97E-14 |
| 1740 | 9.49E-14 | 0.934 | 1.01E+00 | 1.01 | 9.07E-14 |
| 1790 | 1.07E-13 | 0.933 | 1.01E+00 | 1.02 | 1.03E-13 |
| 1840 | 1.20E-13 | 0.931 | 1.01E+00 | 1.02 | 1.16E-13 |
| 1890 | 1.34E-13 | 0.930 | 1.01E+00 | 1.03 | 1.30E-13 |
| 1940 | 1.48E-13 | 0.928 | 1.01E+00 | 1.04 | 1.45E-13 |
| 1990 | 1.64E-13 | 0.927 | 1.01E+00 | 1.05 | 1.61E-13 |



|      |          |       |          |      |          |
|------|----------|-------|----------|------|----------|
| 2040 | 1.81E-13 | 0.925 | 1.01E+00 | 1.05 | 1.79E-13 |
| 2090 | 2.00E-13 | 0.924 | 1.01E+00 | 1.06 | 1.98E-13 |
| 2140 | 2.19E-13 | 0.923 | 1.01E+00 | 1.07 | 2.18E-13 |
| 2190 | 2.39E-13 | 0.921 | 1.01E+00 | 1.08 | 2.39E-13 |
| 2240 | 2.61E-13 | 0.920 | 1.01E+00 | 1.08 | 2.62E-13 |
| 2290 | 2.84E-13 | 0.919 | 1.01E+00 | 1.09 | 2.86E-13 |
| 2340 | 3.08E-13 | 0.917 | 1.01E+00 | 1.10 | 3.12E-13 |
| 2390 | 3.33E-13 | 0.916 | 1.01E+00 | 1.10 | 3.39E-13 |
| 2440 | 3.60E-13 | 0.915 | 1.01E+00 | 1.11 | 3.68E-13 |
| 2490 | 3.88E-13 | 0.914 | 1.01E+00 | 1.11 | 3.98E-13 |
| 2540 | 4.18E-13 | 0.913 | 1.01E+00 | 1.12 | 4.30E-13 |
| 2590 | 4.48E-13 | 0.911 | 1.01E+00 | 1.13 | 4.63E-13 |
| 2640 | 4.81E-13 | 0.910 | 1.01E+00 | 1.13 | 4.98E-13 |
| 2690 | 5.14E-13 | 0.909 | 1.01E+00 | 1.14 | 5.35E-13 |
| 2740 | 5.50E-13 | 0.908 | 1.01E+00 | 1.14 | 5.73E-13 |
| 2790 | 5.86E-13 | 0.907 | 1.01E+00 | 1.15 | 6.14E-13 |
| 2840 | 6.25E-13 | 0.906 | 1.01E+00 | 1.15 | 6.55E-13 |
| 2890 | 6.64E-13 | 0.905 | 1.00E+00 | 1.16 | 6.99E-13 |
| 2940 | 7.06E-13 | 0.904 | 1.00E+00 | 1.16 | 7.45E-13 |
| 2990 | 7.49E-13 | 0.902 | 1.00E+00 | 1.17 | 7.92E-13 |
| 3000 | 7.60E-13 | 0.902 | 1.00E+00 | 1.17 | 8.05E-13 |

Table S7. The total rate constant ( $\text{cm}^3 \text{ molecule}^{-1} \text{ s}^{-1}$ ) of the HNCO + OH reaction.

| T(K) | $k_1$    | $k_2$    | $k_{total}$ | $E_a$ |
|------|----------|----------|-------------|-------|
| 190  | 1.80E-15 | 3.54E-22 | 1.80E-15    | -0.06 |
| 200  | 1.76E-15 | 8.38E-22 | 1.76E-15    | -1.20 |
| 210  | 1.75E-15 | 1.86E-21 | 1.75E-15    | -1.04 |
| 220  | 1.79E-15 | 3.89E-21 | 1.79E-15    | -0.89 |
| 230  | 1.86E-15 | 7.71E-21 | 1.86E-15    | -0.74 |
| 240  | 1.96E-15 | 1.46E-20 | 1.96E-15    | -0.59 |
| 250  | 2.08E-15 | 2.63E-20 | 2.08E-15    | -0.45 |
| 260  | 2.22E-15 | 4.55E-20 | 2.22E-15    | -0.31 |
| 270  | 2.39E-15 | 7.62E-20 | 2.39E-15    | -0.18 |
| 280  | 2.59E-15 | 1.23E-19 | 2.59E-15    | -0.05 |
| 290  | 2.81E-15 | 1.94E-19 | 2.81E-15    | 0.07  |
| 298  | 3.00E-15 | 2.73E-19 | 3.00E-15    | 0.17  |
| 300  | 3.05E-15 | 2.96E-19 | 3.05E-15    | 0.19  |
| 310  | 3.33E-15 | 4.42E-19 | 3.33E-15    | 0.31  |

|      |          |          |          |       |
|------|----------|----------|----------|-------|
| 320  | 3.62E-15 | 6.45E-19 | 3.62E-15 | 0.42  |
| 330  | 3.95E-15 | 9.22E-19 | 3.95E-15 | 0.52  |
| 340  | 4.30E-15 | 1.29E-18 | 4.31E-15 | 0.62  |
| 350  | 4.69E-15 | 1.78E-18 | 4.69E-15 | 0.72  |
| 390  | 6.56E-15 | 5.55E-18 | 6.56E-15 | 1.07  |
| 440  | 9.75E-15 | 1.77E-17 | 9.77E-15 | 1.42  |
| 490  | 1.40E-14 | 4.57E-17 | 1.41E-14 | 1.71  |
| 540  | 1.96E-14 | 1.01E-16 | 1.97E-14 | 1.96  |
| 590  | 2.68E-14 | 2.01E-16 | 2.70E-14 | 2.16  |
| 640  | 3.57E-14 | 3.63E-16 | 3.61E-14 | 2.32  |
| 690  | 4.66E-14 | 6.12E-16 | 4.72E-14 | 2.47  |
| 740  | 5.98E-14 | 9.76E-16 | 6.08E-14 | 5.63  |
| 790  | 7.55E-14 | 1.48E-15 | 7.70E-14 | 5.86  |
| 840  | 9.41E-14 | 2.16E-15 | 9.63E-14 | 6.15  |
| 890  | 1.16E-13 | 3.06E-15 | 1.19E-13 | 6.47  |
| 940  | 1.41E-13 | 4.19E-15 | 1.45E-13 | 6.80  |
| 990  | 1.69E-13 | 5.62E-15 | 1.75E-13 | 7.15  |
| 1040 | 2.02E-13 | 7.38E-15 | 2.09E-13 | 7.50  |
| 1090 | 2.39E-13 | 9.50E-15 | 2.48E-13 | 7.85  |
| 1140 | 2.80E-13 | 1.20E-14 | 2.92E-13 | 8.19  |
| 1190 | 3.26E-13 | 1.50E-14 | 3.41E-13 | 8.54  |
| 1240 | 3.78E-13 | 1.85E-14 | 3.96E-13 | 8.88  |
| 1290 | 4.34E-13 | 2.25E-14 | 4.57E-13 | 9.21  |
| 1340 | 4.97E-13 | 2.71E-14 | 5.24E-13 | 9.54  |
| 1390 | 5.65E-13 | 3.24E-14 | 5.97E-13 | 9.86  |
| 1440 | 6.39E-13 | 3.83E-14 | 6.77E-13 | 10.18 |
| 1490 | 7.19E-13 | 4.50E-14 | 7.64E-13 | 10.50 |
| 1540 | 8.07E-13 | 5.24E-14 | 8.59E-13 | 10.80 |
| 1590 | 9.00E-13 | 6.06E-14 | 9.61E-13 | 11.11 |
| 1640 | 1.00E-12 | 6.97E-14 | 1.07E-12 | 11.41 |
| 1690 | 1.11E-12 | 7.97E-14 | 1.19E-12 | 11.70 |
| 1740 | 1.23E-12 | 9.07E-14 | 1.32E-12 | 11.99 |
| 1790 | 1.35E-12 | 1.03E-13 | 1.45E-12 | 12.28 |
| 1840 | 1.48E-12 | 1.16E-13 | 1.60E-12 | 12.56 |
| 1890 | 1.62E-12 | 1.30E-13 | 1.75E-12 | 12.84 |
| 1940 | 1.77E-12 | 1.45E-13 | 1.91E-12 | 13.12 |
| 1990 | 1.92E-12 | 1.61E-13 | 2.09E-12 | 13.39 |
| 2040 | 2.09E-12 | 1.79E-13 | 2.27E-12 | 13.66 |
| 2090 | 2.26E-12 | 1.98E-13 | 2.46E-12 | 13.93 |
| 2140 | 2.44E-12 | 2.18E-13 | 2.66E-12 | 14.20 |
| 2190 | 2.64E-12 | 2.39E-13 | 2.88E-12 | 14.46 |
| 2240 | 2.84E-12 | 2.62E-13 | 3.10E-12 | 14.72 |
| 2290 | 3.05E-12 | 2.86E-13 | 3.33E-12 | 14.98 |

|      |          |          |          |       |
|------|----------|----------|----------|-------|
| 2340 | 3.27E-12 | 3.12E-13 | 3.58E-12 | 15.24 |
| 2390 | 3.50E-12 | 3.39E-13 | 3.84E-12 | 15.49 |
| 2440 | 3.74E-12 | 3.68E-13 | 4.11E-12 | 15.75 |
| 2490 | 3.99E-12 | 3.98E-13 | 4.39E-12 | 16.00 |
| 2540 | 4.24E-12 | 4.30E-13 | 4.67E-12 | 16.25 |
| 2590 | 4.51E-12 | 4.63E-13 | 4.97E-12 | 16.50 |
| 2640 | 4.79E-12 | 4.98E-13 | 5.29E-12 | 16.74 |
| 2690 | 5.08E-12 | 5.35E-13 | 5.61E-12 | 16.99 |
| 2740 | 5.37E-12 | 5.73E-13 | 5.95E-12 | 17.23 |
| 2790 | 5.68E-12 | 6.14E-13 | 6.29E-12 | 17.48 |
| 2840 | 6.01E-12 | 6.55E-13 | 6.67E-12 | 17.72 |
| 2890 | 6.34E-12 | 6.99E-13 | 7.04E-12 | 17.96 |
| 2940 | 6.68E-12 | 7.45E-13 | 7.43E-12 | 18.20 |
| 2990 | 7.03E-12 | 7.92E-13 | 7.83E-12 | 18.44 |
| 3000 | 7.10E-12 | 8.05E-13 | 7.90E-12 | 18.49 |

Table S8. The conventional transition state theory (TST) rate constants ( $\text{cm}^3 \text{ molecule}^{-1} \text{ s}^{-1}$ ) without a transmission coefficient for  $\text{HNCO} + \text{OH}$  reaction.

| T(K) | $k_1^a$  | $k_1'^b$ | $k_2^a$  | $k_2'^b$ | $f_1^c$ | $f_2^c$ |
|------|----------|----------|----------|----------|---------|---------|
| 190  | 3.06E-18 | 1.02E-18 | 9.72E-23 | 6.8E-23  | 3.01    | 1.43    |
| 200  | 5.72E-18 | 2.00E-18 | 2.77E-22 | 1.97E-22 | 2.86    | 1.41    |
| 210  | 1.01E-17 | 3.71E-18 | 7.14E-22 | 5.16E-22 | 2.73    | 1.38    |
| 220  | 1.70E-17 | 6.50E-18 | 1.69E-21 | 1.24E-21 | 2.61    | 1.36    |
| 230  | 2.73E-17 | 1.09E-17 | 3.72E-21 | 2.77E-21 | 2.51    | 1.35    |
| 240  | 4.24E-17 | 1.75E-17 | 7.67E-21 | 5.77E-21 | 2.43    | 1.33    |
| 250  | 6.35E-17 | 2.70E-17 | 1.49E-20 | 1.14E-20 | 2.35    | 1.31    |
| 260  | 9.25E-17 | 4.06E-17 | 2.77E-20 | 2.13E-20 | 2.28    | 1.30    |
| 270  | 1.31E-16 | 5.91E-17 | 4.91E-20 | 3.81E-20 | 2.22    | 1.29    |
| 280  | 1.82E-16 | 8.41E-17 | 8.36E-20 | 6.54E-20 | 2.16    | 1.28    |
| 290  | 2.47E-16 | 1.17E-16 | 1.37E-19 | 1.08E-19 | 2.11    | 1.27    |
| 298  | 3.11E-16 | 1.50E-16 | 2.00E-19 | 1.58E-19 | 2.07    | 0.94    |
| 300  | 3.29E-16 | 1.59E-16 | 2.19E-19 | 1.74E-19 | 2.07    | 1.26    |
| 310  | 4.3E-16  | 2.13E-16 | 3.38E-19 | 2.71E-19 | 2.02    | 1.25    |
| 320  | 5.55E-16 | 2.80E-16 | 5.10E-19 | 4.11E-19 | 1.99    | 1.24    |
| 330  | 7.06E-16 | 3.62E-16 | 7.50E-19 | 6.08E-19 | 1.95    | 1.23    |
| 340  | 8.86E-16 | 4.62E-16 | 1.08E-18 | 8.81E-19 | 1.92    | 1.23    |
| 350  | 1.10E-15 | 5.83E-16 | 1.53E-18 | 1.25E-18 | 1.89    | 1.22    |
| 390  | 2.37E-15 | 1.32E-15 | 5.13E-18 | 4.29E-18 | 1.79    | 1.20    |
| 440  | 5.19E-15 | 3.06E-15 | 1.75E-17 | 1.49E-17 | 1.70    | 1.17    |

|      |          |          |          |          |      |      |
|------|----------|----------|----------|----------|------|------|
| 490  | 9.93E-15 | 6.11E-15 | 4.74E-17 | 4.10E-17 | 1.63 | 1.16 |
| 540  | 1.72E-14 | 1.09E-14 | 1.09E-16 | 9.52E-17 | 1.57 | 1.14 |
| 590  | 2.77E-14 | 1.80E-14 | 2.20E-16 | 1.95E-16 | 1.53 | 1.13 |
| 640  | 4.20E-14 | 2.80E-14 | 4.05E-16 | 3.60E-16 | 1.50 | 1.12 |
| 690  | 6.08E-14 | 4.13E-14 | 6.89E-16 | 6.18E-16 | 1.47 | 1.12 |
| 740  | 8.49E-14 | 5.86E-14 | 1.10E-15 | 9.96E-16 | 1.45 | 1.11 |
| 790  | 1.15E-13 | 8.05E-14 | 1.68E-15 | 1.53E-15 | 1.43 | 1.10 |
| 840  | 1.52E-13 | 1.07E-13 | 2.46E-15 | 2.24E-15 | 1.41 | 1.10 |
| 890  | 1.96E-13 | 1.40E-13 | 3.48E-15 | 3.18E-15 | 1.40 | 1.09 |
| 940  | 2.49E-13 | 1.79E-13 | 4.77E-15 | 4.37E-15 | 1.39 | 1.09 |
| 990  | 3.10E-13 | 2.26E-13 | 6.37E-15 | 5.86E-15 | 1.38 | 1.09 |
| 1040 | 3.82E-13 | 2.79E-13 | 8.32E-15 | 7.68E-15 | 1.37 | 1.08 |
| 1090 | 4.64E-13 | 3.41E-13 | 1.07E-14 | 9.87E-15 | 1.36 | 1.08 |
| 1140 | 5.57E-13 | 4.12E-13 | 1.35E-14 | 1.25E-14 | 1.35 | 1.08 |
| 1190 | 6.63E-13 | 4.93E-13 | 1.67E-14 | 1.55E-14 | 1.35 | 1.08 |
| 1240 | 7.82E-13 | 5.84E-13 | 2.05E-14 | 1.91E-14 | 1.34 | 1.07 |
| 1290 | 9.14E-13 | 6.85E-13 | 2.48E-14 | 2.31E-14 | 1.33 | 1.07 |
| 1340 | 1.06E-12 | 7.98E-13 | 2.97E-14 | 2.78E-14 | 1.33 | 1.07 |
| 1390 | 1.22E-12 | 9.23E-13 | 3.53E-14 | 3.30E-14 | 1.33 | 1.07 |
| 1440 | 1.40E-12 | 1.06E-12 | 4.15E-14 | 3.88E-14 | 1.32 | 1.07 |
| 1490 | 1.60E-12 | 1.21E-12 | 4.84E-14 | 4.54E-14 | 1.32 | 1.07 |
| 1540 | 1.81E-12 | 1.38E-12 | 5.61E-14 | 5.26E-14 | 1.31 | 1.07 |
| 1590 | 2.04E-12 | 1.56E-12 | 6.45E-14 | 6.06E-14 | 1.31 | 1.06 |
| 1640 | 2.29E-12 | 1.75E-12 | 7.38E-14 | 6.94E-14 | 1.31 | 1.06 |
| 1690 | 2.56E-12 | 1.96E-12 | 8.39E-14 | 7.90E-14 | 1.31 | 1.06 |
| 1740 | 2.85E-12 | 2.19E-12 | 9.49E-14 | 8.94E-14 | 1.30 | 1.06 |
| 1790 | 3.16E-12 | 2.43E-12 | 1.07E-13 | 1.01E-13 | 1.30 | 1.06 |
| 1840 | 3.50E-12 | 2.69E-12 | 1.20E-13 | 1.13E-13 | 1.30 | 1.06 |
| 1890 | 3.85E-12 | 2.97E-12 | 1.34E-13 | 1.26E-13 | 1.30 | 1.06 |
| 1940 | 4.23E-12 | 3.27E-12 | 1.48E-13 | 1.40E-13 | 1.30 | 1.06 |
| 1990 | 4.64E-12 | 3.58E-12 | 1.64E-13 | 1.55E-13 | 1.29 | 1.06 |
| 2040 | 5.07E-12 | 3.92E-12 | 1.81E-13 | 1.71E-13 | 1.29 | 1.06 |
| 2090 | 5.52E-12 | 4.27E-12 | 2.00E-13 | 1.89E-13 | 1.29 | 1.06 |
| 2140 | 6.00E-12 | 4.65E-12 | 2.19E-13 | 2.07E-13 | 1.29 | 1.06 |
| 2190 | 6.51E-12 | 5.04E-12 | 2.39E-13 | 2.26E-13 | 1.29 | 1.06 |
| 2240 | 7.04E-12 | 5.46E-12 | 2.61E-13 | 2.47E-13 | 1.29 | 1.06 |
| 2290 | 7.60E-12 | 5.90E-12 | 2.84E-13 | 2.69E-13 | 1.29 | 1.06 |
| 2340 | 8.19E-12 | 6.37E-12 | 3.08E-13 | 2.92E-13 | 1.29 | 1.06 |
| 2390 | 8.81E-12 | 6.85E-12 | 3.33E-13 | 3.16E-13 | 1.29 | 1.05 |
| 2440 | 9.46E-12 | 7.36E-12 | 3.60E-13 | 3.42E-13 | 1.28 | 1.05 |
| 2490 | 1.01E-11 | 7.90E-12 | 3.88E-13 | 3.68E-13 | 1.28 | 1.05 |
| 2540 | 1.08E-11 | 8.46E-12 | 4.18E-13 | 3.96E-13 | 1.28 | 1.05 |
| 2590 | 1.16E-11 | 9.04E-12 | 4.48E-13 | 4.26E-13 | 1.28 | 1.05 |

|      |          |          |          |          |      |      |
|------|----------|----------|----------|----------|------|------|
| 2640 | 1.24E-11 | 9.65E-12 | 4.81E-13 | 4.56E-13 | 1.28 | 1.05 |
| 2690 | 1.32E-11 | 1.03E-11 | 5.14E-13 | 4.89E-13 | 1.28 | 1.05 |
| 2740 | 1.40E-11 | 1.09E-11 | 5.50E-13 | 5.22E-13 | 1.28 | 1.05 |
| 2790 | 1.49E-11 | 1.16E-11 | 5.86E-13 | 5.57E-13 | 1.28 | 1.05 |
| 2840 | 1.58E-11 | 1.23E-11 | 6.25E-13 | 5.94E-13 | 1.28 | 1.05 |
| 2890 | 1.67E-11 | 1.31E-11 | 6.64E-13 | 6.32E-13 | 1.28 | 1.05 |
| 2940 | 1.77E-11 | 1.39E-11 | 7.06E-13 | 6.71E-13 | 1.28 | 1.05 |
| 2990 | 1.87E-11 | 1.47E-11 | 7.49E-13 | 7.12E-13 | 1.28 | 1.05 |
| 3000 | 1.89E-11 | 1.48E-11 | 7.60E-13 | 7.20E-13 | 1.28 | 1.05 |

<sup>a</sup>  $k_1$  and  $k_2$  are the conventional transition state theory rate constants calculated using the specific-reaction scale factors.

<sup>b</sup>  $k'_1$  and  $k'_2$  are the conventional transition state theory rate constants calculated using the scale factors obtained by the standard method.

<sup>c</sup>  $f_1$  and  $f_2$  are equal to  $k_1/k'_1$  and  $k_2/k'_2$  respectively.

Table S9. Absolute energies (Hartree) and the Cartesian coordinates (Å) of the optimized geometries.

(a) by CCSD(T)-F12a/cc-pVTZ-F12

| species | Absolute energies | Cartesian coordinates |               |               |               |
|---------|-------------------|-----------------------|---------------|---------------|---------------|
| OH      | -75.674101        | O                     | 0.0000000000  | 0.0000000000  | 0.1080069596  |
|         |                   | H                     | 0.0000000000  | 0.0000000000  | -0.8625469596 |
| HNCO    | -168.511459       | C                     | 0.0078532480  | 0.0445787126  | 0.0000000000  |
|         |                   | O                     | -0.3670205795 | 1.1485223621  | 0.0000000000  |
|         |                   | N                     | 0.2410710237  | -1.1502686006 | 0.0000000000  |
|         |                   | H                     | 1.1741183078  | -1.5237844742 | 0.0000000000  |
| TS1     | -244.175237       | C                     | -0.8182306315 | 0.1472788647  | 0.0031858264  |
|         |                   | O                     | -1.7748344663 | -0.5188358602 | -0.0010636888 |
|         |                   | N                     | 0.1124306872  | 0.9510521047  | 0.0337956306  |
|         |                   | H                     | 1.1847122868  | 0.5380590300  | -0.1917543780 |
|         |                   | H                     | 2.0455841336  | -0.5288590516 | 0.8482346742  |
|         |                   | O                     | 1.9157359902  | -0.4463360876 | -0.1092560643 |
| TS2     | -244.175133       | C                     | 0.4318203696  | -0.1651781984 | -0.0244269571 |
|         |                   | O                     | 1.3810261484  | 0.5056337872  | -0.0076287275 |
|         |                   | N                     | -0.2486341090 | -1.2288213610 | 0.1202338607  |
|         |                   | H                     | -0.9064952649 | -1.4349502181 | -0.6221362980 |
|         |                   | H                     | -1.5012951113 | 0.7565171809  | 0.8157192594  |
|         |                   | O                     | -1.1913670328 | 0.7825428092  | -0.1018351375 |

|                  |             |   |               |               |               |
|------------------|-------------|---|---------------|---------------|---------------|
| NCO              | -167.825323 | C | 0.0000000000  | 0.0000000000  | -0.0381971211 |
|                  |             | N | 0.0000000000  | 0.0000000000  | -1.2677076313 |
|                  |             | O | 0.0000000000  | 0.0000000000  | 1.1393457525  |
| H <sub>2</sub> O | -76.374113  | H | 0.7575842167  | -0.4649772311 | 0.0000000000  |
|                  |             | H | -0.7575827122 | -0.4649830468 | 0.0000000000  |
|                  |             | O | -0.0000015045 | 0.1226092779  | 0.0000000000  |
| P2               | -244.223985 | C | -0.0472138727 | 0.1026143564  | 0.0067644772  |
|                  |             | O | -0.5952444592 | 1.1770277299  | -0.0268936184 |
|                  |             | N | -0.7392491636 | -1.1056529178 | -0.1011562686 |
|                  |             | H | -1.6032703366 | -1.0082282254 | 0.4354561666  |
|                  |             | H | 1.5003595225  | -0.9635654864 | -0.0430820436 |
|                  |             | O | 1.2859773096  | -0.0265254568 | 0.0393962868  |

(b) by CCSD(T)-F12a/cc-pVDZ-F12

| species          | Absolute energies | Cartesian coordinates |               |               |               |
|------------------|-------------------|-----------------------|---------------|---------------|---------------|
| OH               | -75.663803        | O                     | 0.0000000000  | 0.0000000000  | 0.1080720808  |
|                  |                   | H                     | 0.0000000000  | 0.0000000000  | -0.8626120808 |
| HNCO             | -168.491147       | C                     | 0.0083644972  | 0.0441899232  | 0.0000000000  |
|                  |                   | O                     | -0.3665371036 | 1.1488159607  | 0.0000000000  |
|                  |                   | N                     | 0.2397972676  | -1.1520146993 | 0.0000000000  |
|                  |                   | H                     | 1.1743973388  | -1.5219431846 | 0.0000000000  |
| TS1              | -244.144401       | C                     | -0.8129977676 | 0.1460527704  | 0.0044286340  |
|                  |                   | O                     | -1.7690306305 | -0.5215756944 | -0.0030964562 |
|                  |                   | N                     | 0.1158035350  | 0.9536973908  | 0.0402788152  |
|                  |                   | H                     | 1.1850881575  | 0.5401280492  | -0.1976787347 |
|                  |                   | H                     | 2.0406080797  | -0.5245414385 | 0.8483833989  |
|                  |                   | O                     | 1.9059266260  | -0.4514020774 | -0.1091736572 |
| TS2              | -244.144726       | C                     | 0.4321826054  | -0.1659569116 | -0.0247959500 |
|                  |                   | O                     | 1.3825360898  | 0.5042084468  | -0.0088109072 |
|                  |                   | N                     | -0.2496252273 | -1.2297348605 | 0.1224628721  |
|                  |                   | H                     | -0.9031209270 | -1.4346241130 | -0.6243066845 |
|                  |                   | H                     | -1.5020910883 | 0.7581731772  | 0.8169631352  |
|                  |                   | O                     | -1.1948264528 | 0.7836782612  | -0.1015864657 |
| NCO              | -167.805926       | C                     | 0.0000000000  | 0.0000000000  | -0.0384214242 |
|                  |                   | N                     | 0.0000000000  | 0.0000000000  | -1.2684685127 |
|                  |                   | O                     | 0.0000000000  | 0.0000000000  | 1.1403309369  |
| H <sub>2</sub> O | -76.363197        | H                     | 0.7573402916  | -0.4650872813 | 0.0000000000  |
|                  |                   | H                     | -0.7573387874 | -0.4650930961 | 0.0000000000  |
|                  |                   | O                     | -0.0000015042 | 0.1228293774  | 0.0000000000  |
| P2               | -244.193323       | C                     | -0.0472897457 | 0.1028237918  | 0.0067860742  |

|  |  |   |               |               |               |
|--|--|---|---------------|---------------|---------------|
|  |  | O | -0.5959512830 | 1.1776988031  | -0.0266757472 |
|  |  | N | -0.7393925879 | -1.1074657338 | -0.1015842031 |
|  |  | H | -1.6029987420 | -1.0073747170 | 0.4355513031  |
|  |  | H | 1.4997972926  | -0.9638009037 | -0.0428999802 |
|  |  | O | 1.2871940661  | -0.0262112404 | 0.0393075533  |

(c) by CCSD(T)-F12b/*jun*-cc-pVDZ

| species          | Absolute energies | Cartesian coordinates |               |               |               |
|------------------|-------------------|-----------------------|---------------|---------------|---------------|
| OH               | -75.648890        | O                     | 0.0000000000  | 0.0000000000  | 0.1077725725  |
|                  |                   | H                     | 0.0000000000  | 0.0000000000  | -0.8623125725 |
| HNCO             | -168.460631       | C                     | 0.0081127181  | 0.0433003586  | 0.0000000000  |
|                  |                   | O                     | -0.3645814662 | 1.1474373581  | 0.0000000000  |
|                  |                   | N                     | 0.2376798814  | -1.1528919584 | 0.0000000000  |
|                  |                   | H                     | 1.1748108667  | -1.5187977583 | 0.0000000000  |
| TS1              | -244.099234       | C                     | -0.8171450677 | 0.1481664031  | 0.0035873175  |
|                  |                   | O                     | -1.7751388269 | -0.5145956943 | -0.0127866640 |
|                  |                   | N                     | 0.1143036363  | 0.9502493539  | 0.0504477148  |
|                  |                   | H                     | 1.1747872253  | 0.5290162950  | -0.1972355892 |
|                  |                   | H                     | 2.0615401606  | -0.5106361033 | 0.8474373262  |
|                  |                   | O                     | 1.9070508724  | -0.4598412544 | -0.1083081052 |
| TS2              | -244.098622       | C                     | 0.4294503708  | -0.1668343385 | -0.0238513435 |
|                  |                   | O                     | 1.3773477512  | 0.5056818836  | -0.0064187873 |
|                  |                   | N                     | -0.2483110176 | -1.2323617000 | 0.1232495129  |
|                  |                   | H                     | -0.9026565924 | -1.4316884141 | -0.6256911659 |
|                  |                   | H                     | -1.4926844517 | 0.7604563394  | 0.8174592584  |
|                  |                   | O                     | -1.1980910602 | 0.7804902295  | -0.1048214746 |
| NCO              | -167.777768       | C                     | 0.0000000000  | 0.0000000000  | -0.0382888509 |
|                  |                   | N                     | 0.0000000000  | 0.0000000000  | -1.2673677575 |
|                  |                   | O                     | 0.0000000000  | 0.0000000000  | 1.1390976084  |
| H <sub>2</sub> O | -76.346009        | H                     | 0.7571497526  | -0.4647806366 | 0.0000000000  |
|                  |                   | H                     | -0.7571482463 | -0.4647864464 | 0.0000000000  |
|                  |                   | O                     | -0.0000015063 | 0.1222160830  | 0.0000000000  |
| P2               | -244.149175       | C                     | -0.0467630501 | 0.1022558917  | 0.0069878892  |
|                  |                   | O                     | -0.5958245847 | 1.1759682922  | -0.0258847007 |
|                  |                   | N                     | -0.7360862891 | -1.1087488393 | -0.0992111044 |
|                  |                   | H                     | -1.6029305480 | -1.0046251125 | 0.4332890973  |
|                  |                   | H                     | 1.4974519430  | -0.9632028763 | -0.0435917295 |
|                  |                   | O                     | 1.2855115290  | -0.0259773559 | 0.0388955482  |

(d) by M08-HX/MG3S

| species | Absolute energies | Cartesian coordinates |            |            |             |
|---------|-------------------|-----------------------|------------|------------|-------------|
| OH      | -75.7272          | O                     | 0.00000000 | 0.00000000 | 0.10779100  |
|         |                   | H                     | 0.00000000 | 0.00000000 | -0.86233100 |
| HNCO    | -168.678          | C                     | 0.00000000 | 0.04827500 | 0.00000000  |

|                  |             |   |             |             |             |
|------------------|-------------|---|-------------|-------------|-------------|
|                  |             | O | -0.37140400 | 1.14412200  | 0.00000000  |
|                  |             | N | 0.25730100  | -1.12821300 | 0.00000000  |
|                  |             | H | 1.17012500  | -1.54513600 | 0.00000000  |
| C1               | -244.411995 | C | 1.19153300  | 0.06442800  | 0.00000000  |
|                  |             | O | 2.27913600  | -0.33889600 | 0.00000000  |
|                  |             | N | 0.11668900  | 0.59849700  | 0.00000000  |
|                  |             | H | -0.80636600 | 0.18840100  | 0.00000100  |
|                  |             | H | -3.37058800 | 0.43802300  | -0.00000400 |
|                  |             | O | -2.75276900 | -0.31141200 | 0.00000000  |
| TS1              | -244.393    | C | -0.84585500 | 0.15279100  | 0.00077900  |
|                  |             | O | -1.80397400 | -0.49641800 | -0.00403000 |
|                  |             | N | 0.09856800  | 0.91888400  | 0.02798000  |
|                  |             | H | 1.19493900  | 0.51906000  | -0.18492300 |
|                  |             | H | 2.07882100  | -0.53128800 | 0.84715100  |
|                  |             | O | 1.94289900  | -0.42067000 | -0.10381500 |
| TS2              | -244.392    | C | 0.43432600  | -0.16806000 | -0.02186000 |
|                  |             | O | 1.36852400  | 0.50763400  | -0.00324500 |
|                  |             | N | -0.23926700 | -1.22589600 | 0.10663400  |
|                  |             | H | -0.91370200 | -1.44095900 | -0.61776100 |
|                  |             | H | -1.50186200 | 0.76781200  | 0.81440300  |
|                  |             | O | -1.18296400 | 0.77521300  | -0.09824500 |
| NCO              | -167.986    | C | 0.00000000  | 0.00000000  | -0.03774800 |
|                  |             | N | 0.00000000  | 0.00000000  | -1.25697600 |
|                  |             | O | 0.00000000  | 0.00000000  | 1.12816500  |
| H <sub>2</sub> O | -76.428     | H | 0.76321900  | -0.46134000 | 0.00000000  |
|                  |             | H | -0.76321900 | -0.46134700 | 0.00000000  |
|                  |             | O | 0.00000000  | 0.11533600  | 0.00000000  |
| P2               | -244.442    | C | -0.04529800 | 0.10336400  | 0.01011300  |
|                  |             | O | -0.59363300 | 1.16855700  | -0.01974100 |
|                  |             | N | -0.73112700 | -1.11268600 | -0.07034000 |
|                  |             | H | -1.62528800 | -0.99788800 | 0.41110900  |
|                  |             | H | 1.51565900  | -0.95763700 | -0.04911000 |
|                  |             | O | 1.28104600  | -0.02804000 | 0.02845400  |

Table S10. Absolute energies in Hartree (1 Hartree = 1.a.u.)

| Species | Methods                               | Total energies (a.u.) |
|---------|---------------------------------------|-----------------------|
| HNCO    | GMM(P).L//CCSD(T)-F12a/cc-pVTZ-F12    | -168.79315388         |
|         | W3X-L//CCSD(T)-F12a/cc-pVTZ-F12       | -168.8008449          |
|         | CCSD(T)-F12a/cc-pVTZ-F12//M08-HX/MG3S | -168.51095823         |
|         | W2X//CCSD(T)-F12a/cc-pVTZ-F12         | -168.79931            |
|         | W2X//CCSD(T)-F12a/cc-pVDZ-F12         | -168.7992887          |



|                  |                                         |               |
|------------------|-----------------------------------------|---------------|
|                  | W2X//CCSD(T)-F12b/ <i>jun'</i> -cc-pVDZ | -168.7992987  |
|                  | MW2-F12//CCSD(T)-F12a/cc-pVTZ-F12       | -168.7917492  |
|                  | MW2-F12.L//CCSD(T)-F12a/cc-pVTZ-F12     | -168.7917186  |
| OH               | GMM(P).L //CCSD(T)-F12a/cc-pVTZ-F12     | -75.79147194  |
|                  | W3X-L//CCSD(T)-F12a/cc-pVTZ-F12         | -75.79360552  |
|                  | CCSD(T)-F12a/cc-pVTZ-F12//M08-HX/MG3S   | -75.674100415 |
|                  | W2X//CCSD(T)-F12a/cc-pVTZ-F12           | -75.79360552  |
|                  | W2X//CCSD(T)-F12a/cc-pVDZ-F12           | -75.79360514  |
|                  | W2X//CCSD(T)-F12b/ <i>jun'</i> -cc-pVDZ | -75.79360651  |
|                  | MW2-F12//CCSD(T)-F12a/cc-pVTZ-F12       | -75.79102264  |
|                  | MW2-F12.L//CCSD(T)-F12a/cc-pVTZ-F12     | -75.79098531  |
| C1               | CCSD(T)-F12a/cc-pVTZ-F12//M08-HX/MG3S   | -244.19142476 |
| TS1              | GMM(P).L //CCSD(T)-F12a/cc-pVTZ-F12     | -244.57517562 |
|                  | W3X-L//CCSD(T)-F12a/cc-pVTZ-F12         | -244.5853091  |
|                  | CCSD(T)-F12a/cc-pVTZ-F12//M08-HX/MG3S   | -244.1747843  |
|                  | W2X//CCSD(T)-F12a/cc-pVTZ-F12           | -244.5823815  |
|                  | W2X//CCSD(T)-F12a/cc-pVDZ-F12           | -244.5823697  |
|                  | W2X//CCSD(T)-F12b/ <i>jun'</i> -cc-pVDZ | -244.5823862  |
|                  | MW2-F12//CCSD(T)-F12a/cc-pVTZ-F12       | -244.5719894  |
|                  | MW2-F12.L//CCSD(T)-F12a/cc-pVTZ-F12     | -244.5718919  |
| TS2              | GMM(P).L //CCSD(T)-F12a/cc-pVTZ-F12     | -244.5750747  |
|                  | W3X-L//CCSD(T)-F12a/cc-pVTZ-F12         | -244.5852808  |
|                  | CCSD(T)-F12a/cc-pVTZ-F12//M08-HX/MG3S   | -244.1539414  |
|                  | W2X//CCSD(T)-F12a/cc-pVTZ-F12           | -244.582311   |
|                  | W2X//CCSD(T)-F12a/cc-pVDZ-F12           | -244.5822868  |
|                  | W2X//CCSD(T)-F12b/ <i>jun'</i> -cc-pVDZ | -244.5822869  |
|                  | MW2-F12//CCSD(T)-F12a/cc-pVTZ-F12       | -244.571893   |
|                  | MW2-F12.L//CCSD(T)-F12a/cc-pVTZ-F12     | -244.571791   |
| NCO              | W3X-L//CCSD(T)-F12a/cc-pVTZ-F12         | -168.1148729  |
|                  | CCSD(T)-F12a/cc-pVTZ-F12//M08-HX/MG3S   | -167.8249162  |
|                  | W2X//CCSD(T)-F12a/cc-pVTZ-F12           | -168.1125304  |
|                  | W2X//CCSD(T)-F12a/cc-pVDZ-F12           | -168.1125109  |
|                  | W2X//CCSD(T)-F12b/ <i>jun'</i> -cc-pVDZ | -168.1125358  |
|                  | MW2-F12//CCSD(T)-F12a/cc-pVTZ-F12       | -168.1049138  |
|                  | MW2-F12.L//CCSD(T)-F12a/cc-pVTZ-F12     | -168.1048898  |
| H <sub>2</sub> O | W3X-L//CCSD(T)-F12a/cc-pVTZ-F12         | -76.49443363  |
|                  | CCSD(T)-F12a/cc-pVTZ-F12//M08-HX/MG3S   | -76.37405896  |
|                  | W2X//CCSD(T)-F12a/cc-pVTZ-F12           | -76.49395354  |

---

|    |                                         |              |
|----|-----------------------------------------|--------------|
|    | W2X//CCSD(T)-F12a/cc-pVDZ-F12           | -76.49395331 |
|    | W2X//CCSD(T)-F12b/ <i>jun'</i> -cc-pVDZ | -76.4939565  |
|    | MW2-F12//CCSD(T)-F12a/cc-pVTZ-F12       | -76.49135252 |
|    | MW2-F12.L//CCSD(T)-F12a/cc-pVTZ-F12     | -76.4912975  |
| P2 | W3X-L//CCSD(T)-F12a/cc-pVTZ-F12         | -244.6333005 |
|    | CCSD(T)-F12a/cc-pVTZ-F12//M08-HX/MG3S   | -244.1632679 |
|    | W2X//CCSD(T)-F12a/cc-pVTZ-F12           | -244.6310548 |
|    | W2X//CCSD(T)-F12a/cc-pVDZ-F12           | -244.6310257 |
|    | W2X//CCSD(T)-F12b/ <i>jun'</i> -cc-pVDZ | -244.6310512 |
|    | MW2-F12//CCSD(T)-F12a/cc-pVTZ-F12       | -244.62069   |
|    | MW2-F12.L//CCSD(T)-F12a/cc-pVTZ-F12     | -244.6206113 |

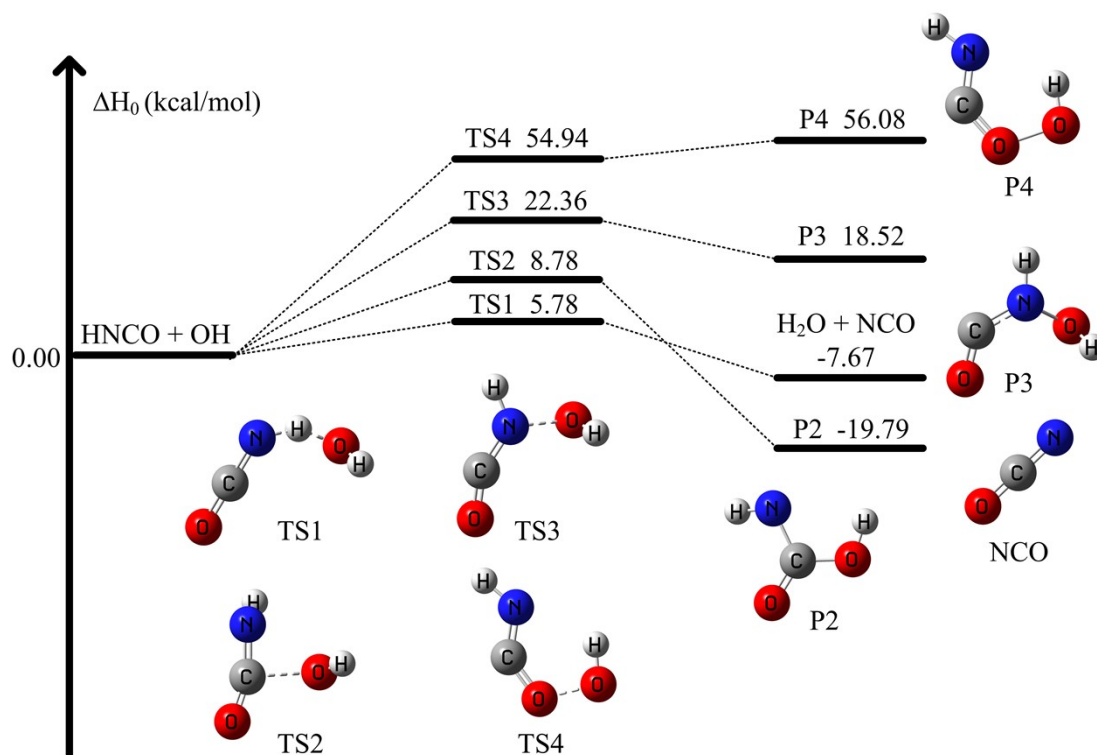

Figure S1. The enthalpy profile of the OH reaction with HNCO at 0 K as calculated by CCSD(T)-F12a/cc-pVTZ-F12//M08-HX/MG3S.

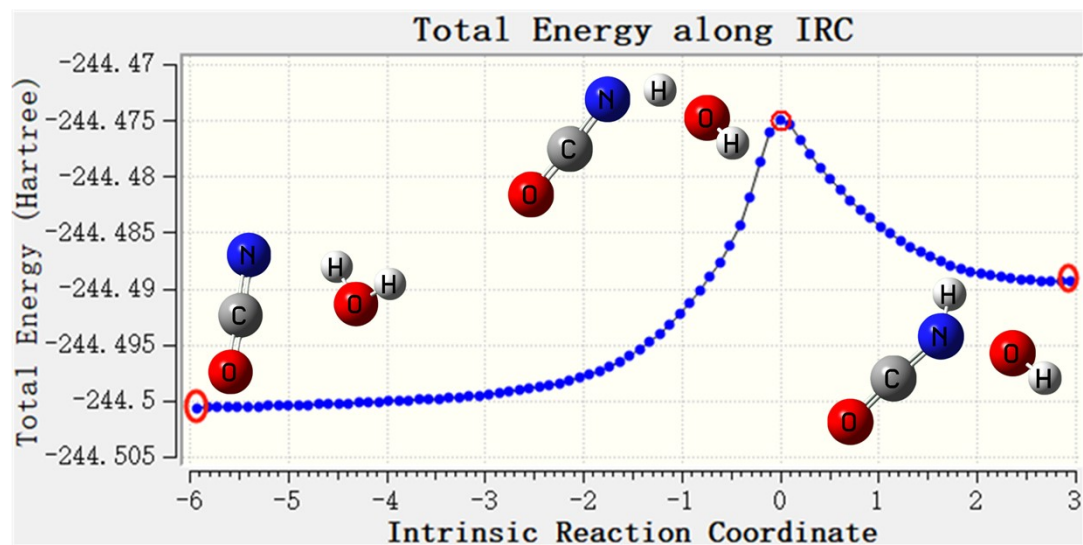

Figure S2. Intrinsic Reaction Coordinate (IRC) calculations for TS1.

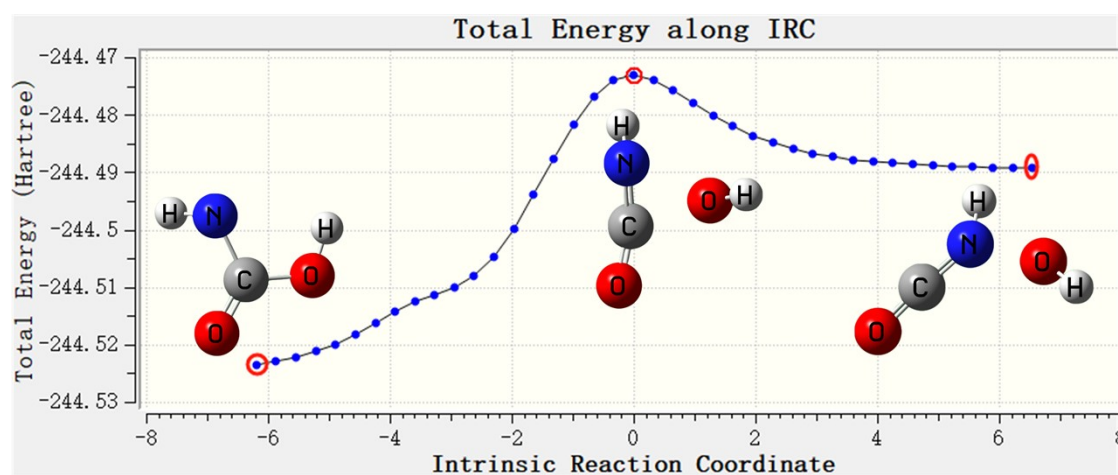

Figure S3. Intrinsic Reaction Coordinate (IRC) calculations for TS2.
